RESEARCH ARTICLE

# The Relationship between Personality Traits, the 5HTT Polymorphisms, and the Occurrence of Anxiety and Depressive Symptoms in Elite Athletes

Annamaria Petito<sup>1</sup>, Mario Altamura<sup>1\*</sup>, Salvatore Iuso<sup>1</sup>, Flavia A. Padalino<sup>1</sup>, Francesco Sessa<sup>2‡</sup>, Giovanna D'Andrea<sup>2‡</sup>, Maurizio Margaglione<sup>2‡</sup>, Antonello Bellomo<sup>1</sup>

**1** Department of Clinical and Experimental Medicine, Psychiatry Unit, University of Foggia, Foggia, Italy, **2** Department of Clinical and Experimental Medicine, Medical Genetics, University of Foggia, Foggia, Italy

☞ These authors contributed equally to this work.

‡ These authors also contributed equally to this work.

\* [m\\_altamura@virgilio.it](mailto:m_altamura@virgilio.it)

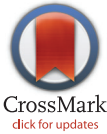

**OPEN ACCESS**

**Citation:** Petito A, Altamura M, Iuso S, Padalino FA, Sessa F, D'Andrea G, et al. (2016) The Relationship between Personality Traits, the 5HTT Polymorphisms, and the Occurrence of Anxiety and Depressive Symptoms in Elite Athletes. PLoS ONE 11(6): e0156601. doi:10.1371/journal.pone.0156601

**Editor:** Graham R. Wallace, University of Birmingham, UNITED KINGDOM

**Received:** December 30, 2015

**Accepted:** May 17, 2016

**Published:** June 3, 2016

**Copyright:** © 2016 Petito et al. This is an open access article distributed under the terms of the [Creative Commons Attribution License](https://creativecommons.org/licenses/by/4.0/), which permits unrestricted use, distribution, and reproduction in any medium, provided the original author and source are credited.

**Data Availability Statement:** All relevant data are within the paper.

**Funding:** The authors have no support or funding to report.

**Competing Interests:** The authors have declared that no competing interests exist.

## Abstract

The purpose of this study was to determine the relationship between personality, the serotonin transporter (5HTT) polymorphisms and the occurrence of anxiety and depressive symptoms in elite athletes. 133 healthy participants completed the NEO Five-Factor Inventory (NEO-FFI). The mood states were assessed using the Profile of Mood States (POMS) questionnaire. The athlete's mental skills were assessed through the Sport Performance Psychological Inventory (IPPS-48). The occurrence of psychiatric and personality disorders was assessed using the Clinical Interview for DSM-IV Disorders. A polymerase chain reaction was employed to identify genotypes at the 5HTTLPR polymorphism. The 5HTTLPR s/s genotype was associated with both neuroticism ( $p < 0.001$ ) and tension/anxiety symptoms according to the POMS ( $p < 0.02$ ), cognitive anxiety and emotional arousal control according to the IPPS-48 ( $p < 0.01$ ). Significant correlations were proved between neuroticism and symptoms of anxiety and depression ( $p < 0.05$ ). Neuroticism mediates the association between the 5HTTLPR polymorphism and symptoms of cognitive anxiety and emotional arousal control ( $p < 0.05$ ). These results suggest a significant interaction between the 5HTTLPR polymorphism, neuroticism and sport related stress that predict adverse mental health outcomes in athletes. Identification of homogeneous groups of athletes having predispositions to anxiety and depressive symptoms may help to implement early prevention programs.

## Introduction

Many studies investigating the relationship between sport participation and mental health have suggested that participation in sport is associated with psychological benefits including

higher levels of self-esteem and lower levels of depression [1, 2]. However, recently, a significant body of research has found evidence of mental health problems associated with sport participation as a result of sport-related significant stressors [3, 4]. A wide range of psychiatric disorders has been reported in the athletic population including depression, anxiety, disordered eating, bipolar disorders and substance abuse [5, 6]. In recent years, the prevalence of depression and anxiety disorders has been reported as increasing in this population [7, 8, 9]. However, the mechanisms leading to both depression and anxiety disorders among athletes are mostly unknown.

Many risk factors have been proposed, such as competition-related stress [10]; ineffective coping strategies [11, 12] overtraining [13, 14]; negative group dynamics/peer interaction [15, 16, 17] and negative interactions with leaders [18, 19]. Besides the above-mentioned factors, individual aspects should be considered. In this regard, specific personality traits that might have an influence on the development of depressive and anxiety symptoms are of interest.

Personality is a multidimensional structure that is created by both environmental and genetic factors. According to twin and family studies, individual variation of the heritable component is estimated to account for 30–60% of variance in personality traits [20, 21]. Serotonin (5-HT) neurotransmission has a key role in the regulation of the activity of the central nervous and influences a wide variety of physiological and psychological processes including individual differences in personality traits [22, 23].

The serotonin transporter gene (SLC6A4) encodes the serotonin transporter protein (5-HTT), which acts as a key regulator by removing serotonin from the synaptic cleft. The promoter region of the SLC6A4 gene contains a polymorphism with short (*s*) and long (*l*) repeats in a region: 5-HTT-linked polymorphic region (5-HTTLPR). The long form was shown to be associated with higher and the short form with lower expression of the gene product [24]. Several studies have provided strong evidence for an association between the 5-HTTLPR short allele and neuroticism, defined as proneness to negative emotionality, including depression and anxiety. Individuals with either one or two copies of the short allele had significantly greater levels of neuroticism than those homozygous for the long allele [25].

The analysis of the association between the 5-HTTLPR polymorphism and neuropsychiatric disorders, including anxiety and depressive syndromes, has shown some positive but contradictory findings. Significant associations between the short variant and susceptibility for mood disorders have been reported [26, 27, 28] but other studies did not confirm these findings [29]. The original results of Caspi et al. [30] suggested that individuals carrying the short (*s*) allele are more likely to develop major depression following exposure to early life stress (e.g., childhood maltreatment). More recently, many investigators found that this polymorphism confers risk for psychopathology in the presence of stress during adulthood [31, 32], which has been confirmed in mouse models [33]. Individuals with one or two copies of the *s* allele exhibited higher levels of depressive symptoms following exposure to stressful events than did individuals who were homozygous for the *l* allele. Perhaps most notably, a number of studies have shown that neuroticism mediates the association between the serotonin transporter gene polymorphism and stress-reactive phenotypes like depression and anxiety by increasing the magnitude of emotional reactivity to stressful events [34, 35]. Taken together, these findings suggest that this genetic polymorphism produces an increased sensitivity to the impact of stressful events that in turn increases the likelihood of anxiety and depression.

Although there is evidence that athletes are highly vulnerable for developing mental health problems due to the level of stress they experience [36] little is known about the association between the 5-HTTLPR polymorphism and the development of depressive and anxiety symptoms in the athlete population. Particularly, several studies addressing the topic of depressive symptomatology in elite athletes reported high levels of depressive symptoms, as assessed by

self-report measures, rather than major depression diagnoses [37, 38, 39]. These findings suggest that subclinical depression and anxiety (i.e., symptoms not meeting the threshold for a formal DSM diagnosis) should be not neglected in the elite athlete population. There is evidence for an association between anxiety-related personality traits such as neuroticism and depressive and anxiety disorders [40]. In addition research suggests that an episode of major depression increases trait neuroticism and it is possible that the mediating effect of neuroticism on the association between the 5-HTT<sub>PR</sub>L genotype and depression may be due, in part at least, to the fact that those who report a history of lifetime major depression will also report elevated trait neuroticism, because of this history [41]. Since we know little about this bi-directional causality we decided to reduce the heterogeneity of our sample by including only participants without a history of depressive or anxiety symptoms meeting the threshold for a formal DSM diagnosis. Most studies investigating the influence of serotonin transporter gene polymorphisms and stressful events on affective disorders have used the diagnoses of depressive and anxiety disorders as outcome variables. However, several researchers suggested that depression and anxiety may best be viewed as dimensional, not a categorical, constructs and explored the influence of the 5-HTTLPR genotype on affective disorders treating anxiety and depression as continuous variables [42, 43]. Therefore, in the current study we used measures of depressive and anxiety symptoms as continuous variables as the outcome variables disorders.

The purpose of this study is to determine the relationship between personality, the presence of the polymorphism in the 5HTT (SLC 6A4) promoter region and the severity of anxiety and depressive symptoms in a homogenous group of elite athletes. We hypothesized that the 5-HTT *s* allele as well as neuroticism might influence the development of depression and anxiety disorders in elite athletes engaged in competitive sports. Furthermore, given existing evidence that neuroticism mediates the putative association between 5-HTTLPR genotype and lifetime major depression [25], it is plausible that the personality trait of neuroticism might mediate the association between this gene and symptoms of anxiety and depression. A mediation analysis was used to test this hypothesis.

## Methods

### Subjects

In this study one hundred and thirty-three elite athletes were recruited from national sporting centers in Apulia Region (Italy) between January 2013 and December 2014. An initial letter of invitation to participate in the research project was sent to head coaches as well as to directors of elite sport organizations. 18 centers agreed to participate in the study. Then, we scheduled a meeting with athletes in the sport centers to describe in more details the purpose and the planning of the project. 73% (133/182) of the men elite players and 63% of the female (12/19) chose to participate, as women represent less than 10% of our sample, it was decided to exclude them as it would be very difficult to obtain an adequate sample size. We scheduled evaluations to coincide with the start of players' season. Participants were healthy men who competed, within the last 5 year, at a national or international level in their chosen sport (soccer, basket ball, hockey), certificated by CONI (Italian National Olympic Committee). All participants were competing in championship competitions when the study was conducted. All participants were informed in details about the purpose of the study. Next, they gave their written consent for taking part in the study, for collecting their blood, as well as storing and subjecting it to a genetic analysis. Exclusion criteria for all participants included a history of traumatic brain injury, epilepsy, developmental disorder, diagnosable current substance abuse dependence or other known neurological condition and the presence or previous presence of psychiatric

disorders. The present study is in accordance with the Helsinki declaration and was approved by the local Institutional Review Board (Comitato Etico ASL-FG; prot. n. 09/CE/07).

## DNA analysis

A blood sample was collected in ethylenediaminetetraacetic acid or sodium citrate from each participant and DNA was extracted from peripheral blood leukocytes according to standard protocols [44]. DNA amplification was amplified using the 2 flanking primers suggested in 1996 by Heils et coll: 5-HTTU:5'GGCGTTGCCGCTCTUAATGC3', nt-1416,-1397 5-HT TL:5'GAGGGACTGAGCTGGACAACCAC, nt-910,-889. This set of primers amplifies a 484/528 fragment corresponding to the SLC6A4\* C short and long allele, respectively. The PCR conditions were slightly modified from Heils et coll. [45]. The PCR reaction was carried out in a total volume of 20  $\mu$ L consisting of 100 ng of genomic DNA, 0.1  $\mu$ mol of primers per liter, 40- $\mu$ mol/L deoxynucleotide triphosphates, 20- $\mu$ mol/L 7-deaza-2'-deoxyguanosine, and 1 unit of AmpliTaq with the appropriate buffer in a Mastercycler polymerase chain reaction thermal cycler (Eppendorf, Hamburg, Germany). Cycling conditions were as follows: 1 denaturing cycle at 95°C for 5 minutes, 2 cycles with a touchdown annealing temperature of 63°C and 62°C, respectively for 30 seconds, and 38 cycles with an annealing temperature at 61°C. Final DNA elongation was at 72°C for 10 minutes. DNA bands were visualized in prestained (0.4- $\mu$ g/mL ethidium bromide) 3% agarose gels that were run for 1 hour at 120 V.

## Psychometric Evaluation

The Structured Clinical Interview for DSM-IV Axis I Disorders (SCID-I) [46] and Structured Clinical Interview for DSM-IV Axis II Personality Disorders (SCID II) [47], were administered to assess current and previous psychiatric diagnoses. The clinical assessment was conducted by psychiatrists and/or licensed research psychologists who were trained to a minimum interclass correlation of 0.80. The NEO Five-Factor Inventory (NEO-FFI) was used to assess of personality [48]. The personality description is given in 5 dimensions: neuroticism, extraversion, agreeableness, openness and conscientiousness. The structure of this test has been validated in a variety of populations and cultures [49, 50, 51] using various personality inventories [52]. The Sport Performance Psychological Inventory (IPPS-48) and the Profile of Mood States (POMS) self-reporting questionnaires were used to assess anxiety and depressive symptoms. The IPPS-48 includes 48 items pertaining to eight factors. These factors are further included into two broader conceptual categories. The Cognitive aspects category encompasses race preparation (RP), goal-setting (GS), mental practice (MP), and self-talk (ST) factors. The Emotional aspects category comprises self-confidence (SC), emotional arousal control (EAC), cognitive anxiety (CA) or worry and concentration disruption (CD). The IPPS-48 possesses good psychometric properties (alpha and test-retest reliability), and discriminant validity [53]. The POMS is a standard validated psychological test formulated by McNair et al. [54] consisting of 65 items that fit into 6 categories: tension-anxiety (T/A), depression-dejection (D/D), anger-hostility (A/H), vigor-activity (V/A), confusion-bewilderment (C/B) and fatigue-inertia (F/I). The Profile of Mood States (POMS), developed as a means of measuring the current mood of patients, has often been employed in studies measuring athletes' emotional states [55]. Interviews and testing were arranged at times convenient for the participants. One hour prior a competition, all participants were also interviewed about the feeling of stress in their own terms [56]. These unstructured interviews began with an open-ended prompt designed to guide the direction of the interview: "Tell me about your experience of stress as an athlete".

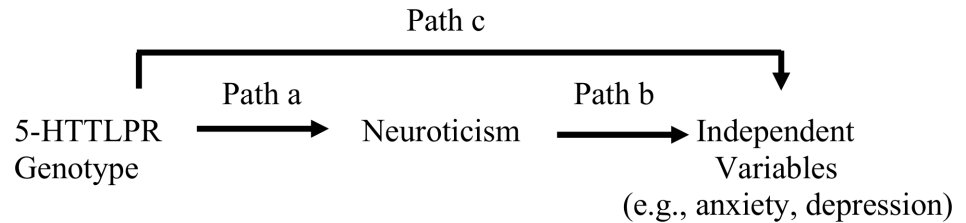

**Fig 1. Paths in mediation model.**

doi:10.1371/journal.pone.0156601.g001

## Statistical Analysis

Analyses were conducted using the statistical software Grand Prism 5 (San Diego, CA, USA). Means and SD have been calculated for each studied parameter, and an alpha level of 0.05 was selected throughout the study. The differences in psychometric dimensions across the three 5HTT-LPR genotype were compared using nonparametric Kruskal Wallis test with Dunn's multiple Comparison post-hoc testing. The assessments of the relationship between dimensions of temperament (NEO-FFI) and mood states (POMS and IPPS-48) were performed using Pearson's correlation. Conformity of empirical genotype frequency distribution to theoretically expected Hardy-Weinberg equilibrium was verified using Pearson  $\chi^2$  test.

## Mediation analyses

A path method was applied to test the hypothesis that the association between 5-HTTLPR genotype and symptoms of anxiety and depression was mediated by trait neuroticism. In particular a series of linear regression models was run to assess the fourth criterion for mediation proposed by Baron and Kenny [57] as described by Frazier et al. [58]. This approach involves testing three equations. First, the outcome variable is regressed on the predictor (Path c) (Fig 1). Second, the mediator is regressed on the predictor variable (Path a). In the third equation, the outcome variable is regressed on both the predictor and the mediator. This provides a test of whether the mediator is related to the outcome (Path b) as well as an estimate of the relation between the predictor and the outcome controlling for the mediator (Path c'). If the relation between the predictor and the outcome is significantly smaller when the mediator is in the equation (Path c') than when the mediator is not in the equation (Path c), the data suggest a mediation effect [58]. Therefore, first, the IPPS-48, POMS scores (the outcome variables) were regressed on the 5-HTTLPR genotype (the predictor; coded as 0 for 'll', 1 for 'ls', and 2 for 'ss') to establish that there was an effect to mediate (Path c). Second, the neuroticism (NEO-FFI) score (the mediator) was regressed on the 5-HTTLPR genotype (the predictor variable) to show that the predictor was related to the mediator (Path a). Finally, the IPPS-48 and POMS scores (the outcome variables) were regressed on both the 5-HTTLPR genotype (the predictor) (Path b) and the neuroticism (NEO-FFI) score (the mediator) (Path c'). To assess the significance of the mediating variable effect we used the method proposed by Baron and Kenny [57]. Specifically, the product of paths a and b is divided by a standard error term. The mediated effect divided by its standard error yields a z score of the mediated effect. If the z score is greater than 1.96, the effect is significant at the .05 level.

## Results

Participants had no history of neurologic, psychiatric disorders or alcohol and other drug-dependence disorders. The average age of the participants was 23.36 (SD = 8.48). ranged from 18–36 years. Mean educational level was 14.41 (SD = 2.42). The genotype subgroups did not

**Table 1. Frequencies of the genotypes and alleles of the 5-HTTLPR.**

| Genotypes  |            |            | Alleles  |          |
|------------|------------|------------|----------|----------|
| <i>l/l</i> | <i>l/s</i> | <i>s/s</i> | <i>l</i> | <i>s</i> |
| (N = 37)   | (N = 74)   | (N = 22)   |          |          |
| 0.28%      | 0.56%      | 0.16%      | 0.56%    | 0.44%    |

doi:10.1371/journal.pone.0156601.t001

differ significantly in age (*s/s* = 24.52 (SD = 4.56); *s/l* = 22.79 (SD = 3.86); *l/l* = 24.06 SD = 4.24) and education years (*s/s* = 14.75 (SD = 2.36); *s/l* = 14.05 (SD = 2.54); *l/l* = 14.44 (SD = 2.36) (all  $p > 0.05$ ). All participants reported high levels of stress related to competition (e.g. pressure to perform well and pressure of meeting expectations). 5-HTTLPR genotype and allele frequencies are shown in [Table 1](#).

The distribution of allele in the sample was in the Hardy-Weinberg equilibrium ( $p > 0.05$ ). The mean scores on the five personality sub-scales of the NEO-FFI for each genotype group are presented in [Table 2](#).

The analyses across the 5HTT-LPR genotype groups (group S (*s/s* + *s/l*); *l/l*; *l/s*; *s/s*) indicated a significant main effect of the *s/s* genotype on neuroticism ( $\chi^2(3) = 16.03, p = 0.001$ ). Post-hoc analyses revealed a recessive effect of the short allele of the 5-HTTLPR gene with increased neuroticism score in the *s/s* genotype group and in the S group compared with the *s/l* and *l/l* groups (all,  $p < 0.05$ ). There was no association with the other major personality sub-scales of the NEO-FFI. The mean scores on sub-scales of the POMS and IPPS for each genotype group are presented in [Tables 3 and 4](#).

There was a significant main effect of 5-HTTLPR genotype on anxiety symptoms according to the POMS ( $\chi^2(3) = 9.034, p = 0.02$ ). Post-hoc analyses revealed that participants with two copies of *s* allele had significantly higher POMS tension /anxiety (T/A) scores than those with the *l/l* genotype ( $p < 0.05$ ). Furthermore, we found a main effect of 5-HTTLPR polymorphism on cognitive anxiety ( $\chi^2(3) = 10.81, p = 0.01$ ) and emotional arousal control ( $\chi^2(3) = 8.358, p = 0.03$ ) according the IPPS-48. Post-hoc analyses revealed that participants with two copies of *s* genotype had higher IPPS cognitive anxiety and lower IPPS emotional arousal control scores than those with the *l/l* genotype (all,  $p < 0.05$ ). A significant correlation was observed between anxiety and depressive symptoms according to the POMS (tension/anxiety, depression/dejection, anger/hostility) and IPSS (cognitive anxiety, emotional arousal control, concentration disruption) and neuroticism according to the NEO-FFI ([Table 5](#)).

The results of regression analyses are summarized in [Table 6](#). These analyses indicated that the criteria proposed for mediation by Baron and Kenny [57] were met for a mediating influence of neuroticism on the association between 5-HTTLPR genotype and tension/anxiety, as measured with POMS, and cognitive anxiety and emotional arousal control as measured with IPPS. To establish the statistical significance of the difference between paths *c* and *c'* we used

**Table 2. Association between 5-HTTLPR genotype and NEO Five-Factor Inventory (NEO-FFI). Mean ± SD. P = level of significance.**

| Genotype                            | N  | Neuroticism  | Extraversion | Openness     | Agreeableness | Coscientiousness |
|-------------------------------------|----|--------------|--------------|--------------|---------------|------------------|
| <i>l/l</i>                          | 37 | 14.40 ± 6.69 | 32.27 ± 4.22 | 24.77 ± 4.68 | 27.50 ± 3.79  | 32.81 ± 5.99     |
| <i>l/s</i>                          | 74 | 17.47 ± 8.93 | 31.62 ± 4.71 | 24.57 ± 5.72 | 28.88 ± 10.87 | 34.47 ± 7.57     |
| <i>s/s</i>                          | 22 | 22.49 ± 6.55 | 29.11 ± 4.22 | 25.26 ± 4.59 | 26.68 ± 4.09  | 32.32 ± 6.78     |
| group S ( <i>l/s</i> + <i>s/s</i> ) | 96 | 18.62 ± 8.68 | 31.04 ± 4.70 | 24.73 ± 5.47 | 28.37 ± 9.76  | 33.98 ± 7.42     |
| P                                   |    | 0.001        | 0.052        | 0.689        | 0.791         | 0.671            |

doi:10.1371/journal.pone.0156601.t002

**Table 3. Association between 5-HTTLPR genotype and Profile of Mood States (POMS). Mean ± SD. P = level of significance.**

| Genotype           | N  | Tension-Anxiety | Depression-Dejection | Anger-Hostility | Confusion-Bewilderment | Fatigue-Inertia | Vigor-Activity | Negative-Mood-States | Total        |
|--------------------|----|-----------------|----------------------|-----------------|------------------------|-----------------|----------------|----------------------|--------------|
| l/l                | 37 | 5.00±3.37       | 4.56±4.78            | 6.60±6.68       | 5.84±4.03              | 6.88±5.24       | 19.68±6.32     | 28.88±14.58          | 9.22 ±16.22  |
| l/s                | 74 | 7.37±5.38       | 4.98±6.22            | 6.58±6.21       | 5.88±4.37              | 8.02±6.25       | 17.63±6.93     | 32.83±20             | 15.2 ±23.16  |
| s/s                | 22 | 9.56±5.48       | 9.89±10.95           | 11.61 ±11.38    | 7.33±6.45              | 8.11±5.62       | 18.28±3.74     | 46.5±33.67           | 28.22 ±34.04 |
| group S (l/s +s/s) | 96 | 7.78± 5.45      | 6.11±7.77            | 7.74±7.92       | 6.22±4.92              | 8.04±6.08       | 17.78±6.33     | 35.98±24.29          | 18.2 ±26.41  |
| P                  |    | 0.028           | 0.674                | 0.665           | 0.987                  | 0.842           | 0.526          | 0.126                | 0.084        |

doi:10.1371/journal.pone.0156601.t003

the Baron and Kenny’s test [57] as described earlier. The application of this test yielded the following results: the drop of the unstandardized regression coefficient associated with cognitive anxiety in the models without (B = 3.51) and with neuroticism (B = 0.31) (i.e., from c to c’) was significant (p < .05). The drop of the unstandardized regression coefficient associated with emotional arousal control in the models without (B = -1.74) and with neuroticism (B = -0.16) also was significant (p < .05); while the drop of the unstandardized regression coefficient associated with tension/anxiety in the models without (B = 0.135) and with neuroticism (B = 0.08) was not significant (p > .05).

### Discussion

We found evidence for an association between a serotonin transporter promoter polymorphism (5-HTTLPR), personality trait of neuroticism, and symptoms of depression and anxiety among elite athletes. Particularly, individuals with 5-HTTLPR s genotypes (s/s, s/l) had increased scores for anxiety as measured with POMS, increased scores for cognitive anxiety and decreased scores for emotional arousal control as assessed with IPPS. In addition, individuals with 5-HTTLPR s genotypes had greater level of neuroticism, as measured by the NEO-FFI, than their counterparts with two copies of l allele. A significant correlation was observed between neuroticism and the severity of negative emotionality according to the POMS (tension-anxiety, depression-dejection, anger-hostility) and the IPPS (cognitive anxiety or worry, emotional arousal control, concentration disruption).

**Table 4. Association between 5-HTTLPR genotype and Sport Performance Psychological Inventory (IPPS-48). Mean ± SD. P = level of significance.**

| Genotype           | N  | RP          | ST          | CA          | SC          | GS          | EAC         | MP          | CD          | Cognitive-Aspects | Emotional-Aspects |
|--------------------|----|-------------|-------------|-------------|-------------|-------------|-------------|-------------|-------------|-------------------|-------------------|
| l/l                | 37 | 25.27 ±7.77 | 20.23 ±8.36 | 15.0 ±5.83  | 27.88 ±8.9  | 22.46 ±6.18 | 24.69 ±4.44 | 21.9± 7.92  | 11.69 ±4.58 | 89.92±1.45        | 25.88±14.7        |
| l/s                | 74 | 24.37 ±6.19 | 22.37 ±7.88 | 18.59 ±7.40 | 24.49 ±8.47 | 22.76 ±8.25 | 22.05± 6.07 | 20.69± 8.01 | 11.05 ±5.34 | 90.19 ±19.28      | 17.31± 19.11      |
| s/s                | 22 | 25.0 ±74.41 | 25.0 ±7.34  | 21.89 ±7.38 | 25.61 ±7.59 | 17.89 ±7.39 | 21.56± 2.08 | 20.22± 8.50 | 12.89± 3.22 | 88.11± 13.9       | 12.39± 11.75      |
| group S (l/s +s/s) | 96 | 24.51 ±5.82 | 22.96 ±7.8  | 19.32 ±7.48 | 24.74 ±8.46 | 21.62 ±8.27 | 21.94± 5.4  | 20.58 ±8.07 | 11.48 ±4.97 | 89.67± 18.16      | 15.88±17.92       |
| P                  |    | 0.2031      | 0.3258      | 0.0128      | 0.9951      | 0.3258      | 0.0392      | 0.6134      | 0.0977      | 0.8551            | 0.0025            |

RP = Race Preparation; ST = Self-Talk; CA = Cognitive Anxiety; SC = Self-Confidence; GS = Goal-Setting; EAC = Emotional Arousal Control; MP = Mental Practice; CD = Concentration Disruption

doi:10.1371/journal.pone.0156601.t004

**Table 5. Correlation (Pearson's r) between and Sport Performance Psychological Inventory (IPPS), Profile of Mood States (POMS) and Neuroticism.**

|                                | Neuroticism             |         |
|--------------------------------|-------------------------|---------|
|                                | Correlation-coefficient | P value |
| POMS Tension-Anxiety           | 0.36                    | 0.0001  |
| POMS Depression-Dejection      | 0.23                    | 0.0175  |
| POMS Anger-Hostility           | 0.27                    | 0.0063  |
| POMS Vigor-Activity            | -0.08                   | 0.4183  |
| POMS Fatigue-Inertia           | 0.19                    | 0.0564  |
| POMS Confusion-Bewilderment    | -0.03                   | 0.7793  |
| IPPS Race Preparation          | -0.13                   | 0.1967  |
| IPPS Self-Talk                 | 0.07                    | 0.5080  |
| IPPS Cognitive Anxiety         | 0.21                    | 0.0368  |
| IPPS Self-Confidence           | 0.15                    | 0.1165  |
| IPPS Goal-Setting              | -0.13                   | 0.1818  |
| IPPS Emotional Arousal Control | -0.24                   | 0.0112  |
| IPPS Mental Practice           | -0.10                   | 0.1486  |
| IPPS Concentration Disruption  | 0.21                    | 0.0320  |
| IPPS Cognitive Aspects         | -0.08                   | 0.4219  |
| IPPS Emotional Aspects         | -0.01                   | 0.9928  |

doi:10.1371/journal.pone.0156601.t005

The association between the 5-HTTLPR ss genotype with anxiety symptoms and decreased emotional arousal control is not unexpected in view of the results of previous studies that revealed a small but significant relationship between the 5-HTTLPR polymorphism and

**Table 6. Mediator Effects Using Multiple Regression.**

| Path c                         | B     | SE B  | 95%CL     | β     | P       |
|--------------------------------|-------|-------|-----------|-------|---------|
| Outcome: Tension-Anxiety       |       |       |           |       |         |
| Predictor: 5HTT genotype       | 0.13  | 0.06  | 1.45,1.74 | 0.17  | 0.03    |
| Outcome: Cognitive-Anxiety     |       |       |           |       |         |
| Predictor: 5HTT genotype       | 3.51  | 0.86  | 13.0,16.8 | 0.33  | 0.0008  |
| Outcome: Arousal-Control       |       |       |           |       |         |
| Predictor: 5HTT genotype       | -1.74 | 0.64  | 22.6,25.4 | -0.23 | 0.007   |
| <b>Path a</b>                  |       |       |           |       |         |
| Outcome: Neuroticism           |       |       |           |       |         |
| Predictor: 5HTT genotype       | 3.60  | 1.04  | 12.3,16.9 | 0.28  | 0.0007  |
| <b>Paths b and c'</b>          |       |       |           |       |         |
| Outcome: Tension-Anxiety       |       |       |           |       |         |
| Mediator: Neuroticism (Path b) | 0.01  | 0.005 | 1.50,1.91 | 0.22  | 0.001   |
| Predictor: 5HTT genotype       | 0.08  | 0.06  | 1.41,1.73 | 0.11  | 0.02    |
| Outcome: Cognitive-Anxiety     |       |       |           |       |         |
| Mediator: Neuroticism (Path b) | 2.39  | 0.06  | 7.71,13.0 | 0.36  | 0.00001 |
| Predictor: 5HTT genotype       | 0.31  | 0.84  | 13.1,16.8 | 0.11  | 0.08    |
| Outcome: Arousal-Control       |       |       |           |       |         |
| Mediator: Neuroticism (Path b) | -1.13 | 0.64  | 24.5,28.5 | -0.15 | 0.00001 |
| Predictor: 5HTT genotype       | -0.16 | 0.06  | 22.6,26.0 | -0.28 | 0.005   |

Only the outcome variables entering the final model are shown. B = unstandardized regression coefficient; SE = Standard Error; CL: Confidence Limits; β = standardized regression coefficient.

doi:10.1371/journal.pone.0156601.t006



anxiety and depression disorders [25, 59, 60, 61, 62]. Recently, a number of studies suggested that biological stress reactivity may be a critical mechanism underlying the association between the serotonin transporter gene and exposure to stressful events in increasing risk for depression [31, 32]. Consistent with this “stress reactivity” several investigators found that, compared with individuals who have an *l* allele, individuals homozygous for the *s* allele exhibit greater amygdala activation in response to fearful stimuli [63, 64] and had higher cortisol levels following exposure to a stressor [31, 65]. Anxiety is associated with raising the level of activation of the body, muscle tension, difficulty and coordinative disturbances in focusing attention, especially when the athlete perceives not have control of the situation [66]. Emotional arousal control contributes managing emotions and channeling energies towards the performance, especially in situations of high stress competitive [67]. Therefore, our findings suggest that athlete with one or two copies of *s* allele were more likely than were their counterpart with two copies of *l* allele to become anxious in response to stressful competitive experiences.

Several studies suggest that 5-HTTLPR genotype predicts reciprocal associations between environmental stress and depressive symptoms in non-patient populations [41, 68]. Specifically, those studies suggest that high environmental stress interacted with the 5-HTTLPR genotype to predict subclinical depression symptoms such that those with the *s* allele had significantly higher depression ratings, as compared to those with the *l* allele. The current study expands upon a growing literature showing that the *s* allele was associated with symptom of anxiety and depression in athletes who are exposed to tremendous psychological stress on a daily basis. The possible determinants of depression and anxiety symptomatology among elite athletes (e.g. cost and effort of the exercise), and the degree to which they may or may not have been experienced, were unexplored in our study, as the focus of the current study was on the experience of depression itself, not its causes. However, it is worth noting that the association between stress related to competition (e.g., pressure to perform well and pressure of meeting expectations) and symptoms of anxiety and depression in our sample is consistent with the results of previous studies that reported that sport specific demands (such as overwhelming demands of training, psychological pressure or failure) are associated with higher levels of depressive symptoms in elite athlete [37, 69].

The association between neuroticism and 5-HTTLPR genotypes is in line with the results of previous studies that revealed a relationship between the 5-HTTLPR polymorphism and anxiety-related personality traits [25, 70]. Neuroticism may contribute to the occurrence of anxiety and depressive symptoms in elite athletes dealing with competitive situations [40]. According to the results of the current study the influence of genetic variation on anxiety and emotion regulation are mediated by neuroticism. First, 5HTTLPR genotype was significantly associated with both neuroticism and symptoms of anxiety and poor emotional control. Second, neuroticism was also significantly associated with anxiety and poor emotional control. Finally, when the association between neuroticism and symptomatology was controlled for, the strength of association between 5HTTLPR genotype and anxiety and emotional symptoms was significantly reduced. In particular our results suggest that the association between 5HTTLPR and symptoms of cognitive anxiety and poor emotional control may be partially mediated by trait neuroticism in elite athletes. This is consistent with the results of previous studies suggesting that personality trait of neuroticism mediates, at least in part, the association between 5HTTLPR genotype and affective disorders [35, 71, 72]. Interestingly, it has been suggested that cognitive anxiety in response to stressful events may mediate the relation between neuroticism and the development of depressive symptoms [73]. These stress-related vulnerabilities associated with neuroticism might be influenced by the participation of the athlete at the highest competitive levels [74].

This study has a number of limitations. First, the assessment of level of stress is based exclusively on self-report rather than clinical interview. Therefore, it will be important to replicate the findings using additional standardized behavioral measures of psychological stress. Second, it would increase the value of this research if the study group was more numerous and adverse life events (e.g., childhood maltreatment) [30], potentially contributing to the incidence and severity of depressive and anxiety symptoms, were taken into consideration. However, from a statistical point of view we employed statistical tests that do not assume equal variance between groups. Third, the findings presented in this article only concern participants without a clinical diagnosis of depression or anxiety disorder; indeed, none of the participants had experienced any previous Axis I and Axis II disorder. Perhaps, the inclusion of such subjects in the study would reveal significantly stronger relationships between the variables analyzed than it was observed in this study. Forth, participants were recruited to investigate possible associations among genotype, personality, exposure to stress, and probability of depression and anxiety disorders. It is possible that trait neuroticism and depression or anxiety symptoms may have been associated with participation, so that our sample may have represented a selected sub-sample of the original population. This may reduce the generalizability of our results. However, there are no grounds for supposing that the association between 5-HTTLPR genotypes, neuroticism and both depression and anxiety symptoms should operate differently in participants compared with compared with non-participants.

Despite these limitations, the present study provides evidence in regard to the associations between the 5-HTTLPR s/s genotype and anxiety, depression symptomatology in elite athletes. Furthermore, we found that neuroticism plays a significant role in the etiology of anxiety and depressive symptoms that might develop in response to stressful sport related events. Despite its all limitations this is an innovative study presenting a new research area and suggesting the direction of further investigation. In conclusion, we have demonstrated a significant relationship between personality, the presence of the 5-HTTLPR polymorphism, and the severity of anxiety and depressive symptoms among elite athletes, an observation that mirrors previous work demonstrating that the same polymorphism predispose to negative psychiatric outcomes in the presence of stressors. This is the first study, to the best of our knowledge, to find a relationship between a gene, anxiety-related personality traits and the severity of negative emotionality among elite athletes.

## Author Contributions

Conceived and designed the experiments: MA AP AB. Performed the experiments: MA AP SI FAP. Analyzed the data: MA AP SI MM. Contributed reagents/materials/analysis tools: MM GD FS. Wrote the paper: MA AP SI AB MM.

## References

1. Proctor SL, Boan-Lenzo C. Prevalence of depressive symptoms in male intercollegiate student-athletes and nonathletes. *J Clin Sport Psychol*. 2010; 4: 204–220.
2. Richman EL, Shaffer DR. If you let me play sports: How Might Sport Participation Influence the Self-Esteem of Adolescent Females? *Psychology of Woman Quarterly* 2000; 24: 189–199.
3. Gill EL Jr. Mental health in college athletics: it's time for social work to get in the game. *Soc Work* 2008; 53:85–8. PMID: [18610824](#)
4. Storch EA, Storch JB, Killikany EM, Roberti JW. Self-reported psychopathology in athletes: A comparison of intercollegiate student-athletes and non-athletes. *Journal of Sport Behavior* 2005; 28: 86–97.
5. Broshek DK, Freeman JR. Psychiatric and neuropsychological issues in sport medicine. *Clinics in Sport Medicine* 2005; 24: 663–679.
6. Puffer JC, Mcshane JM. Depression and chronic fatigue in athletes. *Clin Sports Med*. 1992; 11: 327–338. PMID: [1591789](#)

7. Wolanin A, Gross M, Hong E. Depression in athletes: prevalence and risk factors. *Curr Sports Med Rep.* 2015; 14: 56–60. doi: [10.1249/JSR.000000000000123](https://doi.org/10.1249/JSR.000000000000123) PMID: [25574886](https://pubmed.ncbi.nlm.nih.gov/25574886/)
8. Yang J, Peek-Asa C, Corlette JD, Cheng G, Foster DT, Albright J. Prevalence of and risk factors associated with symptoms of depression in competitive collegiate student athletes. *Clinical Journal of Sport Medicine* 2007; 17: 481–487. PMID: [17993792](https://pubmed.ncbi.nlm.nih.gov/17993792/)
9. Fredericks JA, Alfred-Liro CJ, Hruda LZ, Eccles JS, Patrick H, Ryan AM. A qualitative exploration of adolescents' commitment to athletics and the arts. *Journal of Adolescent Research* 2002; 17: 68–97.
10. Puente-Diaz R, Anshelm MH. Sources of acute stress, cognitive appraisal, and coping strategies among highly skilled Mexican and U.S. competitive tennis players. *J Soc Psychol.* 2005; 145: 429–446. PMID: [16050340](https://pubmed.ncbi.nlm.nih.gov/16050340/)
11. Proctor SL, Boan-Lenzo C. Prevalence of depressive symptoms in male intercollegiate student-athletes and nonathletes. *Journal of Clinical Sport Psychology* 2010; 4: 204–220.
12. Nixdorf I, Frank R, Hautzinger M, Beckmann J. Prevalence of depressive symptoms and correlating variables among German elite athletes. *Journal of Clinical Sport Psychology* 2013; 7: 313–326.
13. O'Connor PJ, Morgan WP, Raglin JS, Barksdale CM, Kalin NH. Mood state and salivary cortisol levels following overtraining in female swimmers. *Psychoneuroendocrinology* 1989; 14: 303–310.
14. Puffer JC, McShane JM. Depression and chronic fatigue in athletes. *Clinics in Sport Medicine* 1992; 11: 327–338.
15. Hansen HC, Helm S. Sacroiliac joint pain and dysfunction. *Pain Physician* 2003; 6: 179–89. PMID: [16883378](https://pubmed.ncbi.nlm.nih.gov/16883378/)
16. Eccles JS, Barber BL. Student Council, basketball, or marching band: Why kind of extracurricular involvement matters? *Journal of Adolescent Research* 1999; 14: 10–43.
17. Mahoney JL. School extracurricular participation as a moderator in the development of antisocial patterns. *Child Development* 2000; 71: 502–516. PMID: [10834480](https://pubmed.ncbi.nlm.nih.gov/10834480/)
18. Hansen DM, Larson RW, Dworkin JB. What adolescents learn to organize youth activities: a survey of self-reported developmental experiences. *Journal of Research on Adolescence* 2003; 13: 25–55.
19. Smoll FL, Smith RE. Leadership behaviours in sport: A theoretical model and research paradigm. *Journal of Applied Social Psychology* 1989; 19: 1522–1551.
20. Bouchard T, Lykken D, McGue M, Segal N, Tellegen A. Sources of human psychological differences: The Minnesota study of twins reared apart. *Science* 1990; 250: 223–238. PMID: [2218526](https://pubmed.ncbi.nlm.nih.gov/2218526/)
21. Bouchard T Jr. Genes environment and personality. *Science* 1994; 264: 1700–1701. PMID: [8209250](https://pubmed.ncbi.nlm.nih.gov/8209250/)
22. Lieben CK, Blokland A, Westerink B, Deutz NE. Acute tryptophan and serotonin depletion using an optimized tryptophan-free protein-carbohydrate mixture in the adult rat. *Neurochemistry International* 2004; 44:9–16. PMID: [12963083](https://pubmed.ncbi.nlm.nih.gov/12963083/)
23. Leonardo ED, Hen R. Genetics of affective and anxiety disorders. *Annual Review of Psychology* 2006; 57: 117–137. PMID: [16318591](https://pubmed.ncbi.nlm.nih.gov/16318591/)
24. Lesch KP, Balling U, Gross J, Strauss K, Wolozin BL, Murphy DL, et al. Organization of the human serotonin transporter gene. *J Neural Transm Gen Sect* 1994; 95: 157–62. PMID: [7865169](https://pubmed.ncbi.nlm.nih.gov/7865169/)
25. Sen S, Burmeister M, Ghosh D. Meta-analysis of the association between a serotonin transporter promoter polymorphism (5-HTTLPR) and anxiety-related personality traits. *Am J Med Genet B Neuropsychiatr Genet.* 2004; 127:85–89.
26. Mossner R, Henneberg A, Schmitt A, Syagailo YV, Grassle M, Hennig T, et al. Allelic variation of serotonin transporter expression is associated with depression in Parkinson's disease. *Mol Psychiatry* 2001; 6: 350–352. PMID: [11326308](https://pubmed.ncbi.nlm.nih.gov/11326308/)
27. Hauser J, Leszczynska A, Samochowiec J, Czerski PM, Ostapowicz A, Chlopocka M, et al. Association analysis of the insertion/deletion polymorphism in serotonin transporter gene in patients with affective disorder. *Eur Psychiatry* 2003; 18: 129–132. PMID: [12763299](https://pubmed.ncbi.nlm.nih.gov/12763299/)
28. Oo KZ, Aung YK, Jenkins MA, Win AK. Associations of 5HTTLPR polymorphism with major depressive disorder and alcohol dependence: A systematic review and meta-analysis. *Aust N Z J Psychiatry* 2016; pii: 0004867416637920.
29. Clarke H, Flint J, Attwood AS, Munafo MR. Association of the 5-HTTLPR genotype and unipolar depression: a meta-analysis. *Psychol Med* 2010; 12: 1–12.
30. Caspi A, Sugden K, Moffitt TE, Taylor A, Craig IW, Harrington H, et al. Influence of life stress on depression: Moderation by a polymorphism in the 5-HTT gene. *Science* 2003; 301: 386–389. PMID: [12869766](https://pubmed.ncbi.nlm.nih.gov/12869766/)
31. Gotlib IH, Joormann J, Minor KL, Hallmayer J. HPA Axis Reactivity: A Mechanism Underlying the Associations Among 5-HTTLPR, Stress, and Depression. *Biol Psychiatry* 2008; 63: 847–851.

32. Kendler KS, Kuhn JW, Vittum J, Prescott CA, Riley B. The interaction of stressful life events and a serotonin transporter polymorphism in the prediction of episodes of major depression. *Arch Gen Psychiatry* 2005; 62: 529–535. PMID: [15867106](#)
33. Bartolomucci A, Carola V, Pascucci T, Puglisi-Allegra S, Cabib S, Lesch KP, et al. Increased vulnerability to psychosocial stress in heterozygous serotonin transporter knockout mice. *Disease Models & Mechanisms* 2010; 3: 459–470.
34. Lahey BB. Public Health Significance of Neuroticism. *Am Psychol* 2009; 64: 241–256. doi: [10.1037/a0015309](#) PMID: [19449983](#)
35. Munafò MR, Clark TG, Roberts KH, Johnstone EC. Neuroticism Mediates the Association of the Serotonin Transporter Gene with Lifetime Major Depression. *Neuropsychobiology* 2006; 53: 1–8. PMID: [16319503](#)
36. Bär KJ, Markser VZ. Sport specificity of mental disorders: the issue of sport psychiatry. *Eur Arch Psychiatry Clin Neurosci*. 2013; 263: 205–10.
37. Nixdorf I, Frank R, Beckmann J. An explorative study on major stressors and its connection to depression and chronic stress among German elite athletes. *Advances in Physical Education*. 2015; 5:255–262.
38. Nixdorf I, Frank R, Hautzinger M, Beckmann J. Prevalence of depressive symptoms and correlating variables among German elite athletes. *Journal of Clinical Sport Psychology*. 2013; 7:313–326.
39. Gouttebauge V, Frings-Dresen MH, Sluiter JK. Mental and psychosocial health among current and former professional footballers. *Occup Med*. 2015; 65:190–6.
40. Lahey BB. Public health significance of neuroticism. *Am Psychol*. 2009; 64:241–256. doi: [10.1037/a0015309](#) PMID: [19449983](#)
41. Ormel J, Oldehinkel AJ, Nolen WA, Vollebergh W. Psychosocial disability before, during, and after a major depressive episode. *Arch Gen Psychiatry* 2004; 61: 387–392. PMID: [15066897](#)
42. Brummett BH, Boyle SH, Siegker IC, Kuhn CM, Ashley-Koch A, Jonassaint CR, et al. Effects of Environmental Stress and Gender on Associations among Symptoms of Depression and the Serotonin Transporter Gene Linked Polymorphic Region (5-HTTLPR). *Behav Genet*. 2008; 38:34–43. PMID: [17955359](#)
43. Ming Q, Zhang Y, Chai Q, Chen H, Hou CJ, Wang MC, et al. Interaction between a serotonin transporter gene promoter region polymorphism and stress predicts depressive symptoms in Chinese adolescents: a multi-wave longitudinal study. *BMC Psychiatry* 2013, 13:142 doi: [10.1186/1471-244X-13-142](#) PMID: [23683292](#)
44. Miller SA, Dykes DD, Polesky HF. A simple salting out procedure for extracting DNA from human nucleated cells. *Nucleic Acids Res*. 1988; 16:1215. PMID: [3344216](#)
45. Heils A, Teufel A, Petri S, Stober G, Riederer P, Bengel D, et al. Allelic variation of human serotonin transporter gene expression. *Neurochem* 1996; 66: 2621–2624.
46. First MB, Gibbon M, Spitzer RL, Williams JBW, Benjamin LS. SCID- I: Structured Clinical Interview for DSM-IV Axis I Disorders. 2000; Giunti OS.
47. First MB, Gibbon M, Spitzer RL, Williams JBW, Benjamin LS. SCID- II: Structured Clinical Interview for DSM-IV Axis II Disorders. 2003; Giunti OS.
48. Costa PT Jr, McCrae RR. The NEO-PI/NEO-FFI manual supplement. 1989; Odessa, FL: Psychological Assessment Resources.
49. Pulver A, Allik J, Pulkkinen L, Hamalainen M. A Big Five personality inventory in two non-Indo European languages. *European Journal of Personality* 1995; 9: 109–124.
50. Rolland JP, Parker WD, Stumpf H. A psychometric examination of the French translations of the NEO-PI-R and NEO- FFI. *Journal of Personality Assessment* 1998; 7: 269–291.
51. Spirrison CL, Choi S. Psychometric properties of a Korean version of the revised NEO-Personality Inventory. *Psychological Reports* 1998; 83: 263–274.
52. Piedmont RL, McCrae RR, Costa PT. Adjective check list scales and the five factor model. *Journal of Personality and Social Psychology* 1991; 60: 630–637.
53. Robazza C, Bortoli L, Gramaccioni C. L'inventario psicologico della prestazione sportiva IPPS-48. *Giornale Italiano di Psicologia dello Sport* 2009; 4: 14–20.
54. McNair DM, Lorr M, Droppleman LF. Manual for profile of Mood States. 1971; San Diego, CA: Educational and Industrial Testing Services.
55. Snow A, LeUnes A. Characteristics of sports research using the Profile of Mood States. *Journal of Sport Behavior* 1994; 17: 207–211.
56. Dale GA. Existential phenomenology: Emphasizing the experience of the athlete in sport psychology research. *The Sport Psychologist* 1996; 10: 307–321.

57. Baron RM, Kenny DA. The moderator-mediator variable distinction in social psychological research: Conceptual, strategic, and statistical considerations. *Journal of Personality and Social Psychology* 1986; 51: 1173–1182. PMID: [3806354](#)
58. Frazier PA, Barron KE, Tix AP. Testing moderator and mediator effects in counseling psychology research. *Journal of Counseling Psychology*. 2004 51: 115–134.
59. Risch N, Herrel R, Lehner T, Liang KY, Eaves L, Hoh J, et al. Interaction between the serotonin transporter gene (5-HTTLPR), stressful life events, and risk of depression: a meta-analysis. *JAMA* 2009; 301:2462–71. doi: [10.1001/jama.2009.878](#) PMID: [19531786](#)
60. Minelli A, Bonvicini C, Scassellati C, Sartori R, Gennarelli M. The influence of psychiatric screening in healthy populations selection: a new study and meta-analysis of functional 5-HTTLPR and rs25531 polymorphisms and anxiety-related personality traits. *BMC Psychiatry*. 2011; 11:50. doi: [10.1186/1471-244X-11-50](#) PMID: [21453464](#)
61. Karg K, Burmeister M, Shedden K, Sen S. The serotonin transporter promoter variant (5-HTTLPR), stress, and depression meta-analysis revisited: evidence of genetic moderation. *Arch Gen Psychiatry* 2011; 68:444–54. doi: [10.1001/archgenpsychiatry.2010.189](#) PMID: [21199959](#)
62. Culverhouse RC, Bowes L, Breslau N, Nurnberger JI Jr, Burmeister M, Fergusson DM, et al. 5-HTTLPR, Stress, and Depression Consortium. Protocol for a collaborative meta-analysis of 5-HTTLPR, stress and depression. *BMC Psychiatry* 2013; 13:304. doi: [10.1186/1471-244X-13-304](#) PMID: [24219410](#)
63. Hariri AR, Mattay VS, Tessitore A, Kolachana B, Fera F, Goldman D, et al. Serotonin transporter genetic variation and the response of the human amygdala. *Science* 2002; 297: 400–403. PMID: [12130784](#)
64. Pezawas L, Meyer-Lindenberg A, Drabant EM, Verchinski BA, Munoz KE, Kolachana BS. 5-HTTLPR polymorphism impacts human cingulate-amygdala interactions: A genetic susceptibility mechanism for depression. *Nature Neurosci* 2005; 8: 828–834. PMID: [15880108](#)
65. Burke TA, Venketasubramanian RN. The epidemiology of stroke in the East Asian region: a literature-based review. 2006; 1:208–15.
66. Weinberg RS, Gould D. *Foundations of sport and exercise psychology*. 2003; (3rd ed.). Champaign, IL: Human Kinetics.
67. Williams J, Harris DV. Relaxation and energizing techniques for regulation of arousal. In Williams J. M. (Ed.), *Applied sport psychology: Personal growth to peak performance* 5th ed. 2006; (pp. 285–305). Mountain View, CA: Mayfield Publishing.
68. Schinka JA, Busch RM, Robichaux-Keene N. A meta-analysis of the association between the serotonin transporter gene polymorphism (5-HTTLPR) and trait anxiety. *Mol Psychiatry* 2004; 9: 197–202. PubMed: PMID: [14966478](#).
69. Gould D, Jackson S, Finch L. (1993). Sources of Stress in National Champion Figure Skaters. *Journal of Sport and Exercise Psychology*, 15:134–159.
70. Gonda X, Juhasz G, Laszik A, Rihmer Z, Bagdy G. Subthreshold depression is linked to the functional polymorphism of the 5HT transporter gene. *J Affect Disord*. 2005; 87:291–297 PMID: [16002148](#)
71. Hutchinson JG, Williams PG. Neuroticism, daily hassles, and depressive symptoms: An examination of moderating and mediating effects. *Personality and Individual Differences* 2007; 42: 1367–1378.
72. Munafò MR, Clark TG, Flint J. Are there sex differences in the association between the 5HTT gene and neuroticism? A meta-analysis. *Pers. Individ. Differ*. 2004; 37: 621–626.
73. Carron AV, Hausenblas HA. *Group Dynamics in Sport* (2nd ed.) 1998; Morgantown, WV: Fitness Information Technology.
74. Barnhofer T, Chittka T. Cognitive reactivity mediates the relationship between neuroticism and depression. *Behaviour Research and Therapy*. 2010; 48:275–281. doi: [10.1016/j.brat.2009.12.005](#) PMID: [20070952](#)
